# Supplementary material for: A Novel Strategy for Selection and Validation of Reference Genes in Dynamic Multidimensional Experimental Design in Yeast
Source: PLoS One. 2012 Jun 4;7(6):e38351. doi: 10.1371/journal.pone.0038351 (PMC3366934; doi:10.1371/journal.pone.0038351)
Supplement: Table S2 — Gene primer sequences and efficiencies used in this study. (XLS) [file pone.0038351.s016.xls]

## Sheet: primers
Primer Name	Primer Sequence	ID	Efficiency (%)	Equation	R2
FBA1-F	GACTTGTACACCAAGCCAGA	8325	87	y=-3.6757x+17.338	0.9771
FBA1-R	GATGTCACCAGCGTACAAAC
PDC1-F	CGCTCGTATCAAGGGTATGT	8326	108	y=-3.1353x+18.892	0.9149
PDC1-R	CTTAGCTTGAGCAGAGATGG
GCN4-F	GCTAGATGACGCTGTAGTGGAA	8383	95	y=-3.4495x+18.86	0.9267
GCN4-R	CGTCAGTGGTAACTGGAATG
RPS26A-F	GGTATTACCGGTGGTGAAGAAG	8387	85	y=-3.7580x+17.799	0.9765
RPS26A-R	AGCAATGGAGAAGTTTGGAGAG
TDH3-F	CAAGGAAACCACCTACGA	8329	86	y=-3.9222x+25.458	0.9374
TDH3-R	CGAAGATGGAAGAGTGAGAG
ARF1-F	CTAACGATAGATCGCGTATTGG	8389	107	y=-3.1751x+24.800	0.8802
ARF1-R	TCTGGCAAATCTTGCTTGTTAG
TPI1-F	GTGTCGGTGTCATCTTGTGT	8388	95	y=-3.4600x+15.300	0.9458
TPI1-R	ACGACGTTAGTCCAGTCCTT
CDC19-F	CAGAGGTGACTTGGGTATTG	8332	103	y=-3.2552x+15.902	0.9783
CDC19-R	GGTTGGTCTTGGGTTGTAAG
PGK1-F	GGAACACCACCCAAGATAC	8333	82	y=-3.8338x+16.763	0.9901
PGK1-R	GGTGACATCCTTACCCAAC
ADH1-F	CAAGTCGTCAAGTCCATCTC	8334	103	y=-3.2442x+16.984	0.9591
ADH1-R	GTAGACAAGCCGACAACCT
CCW12-F	TTTGGTTTCCACCGCTAC	8335	85	y=-3.759x+15.859	0.9214
CCW12-R	CAGCAGAGGTGGTGTTCTTT
ACT1-F	AGAGTTGCCCCAGAAGAACA	8336	93	y=-3.4953+18.755	0.9594
ACT1-R	GGCTTGGATGGAAACGTAGA
HAP4-F	CCTCCTCCATTTCATCTCCA	8337	103	y=3.2442x+22.432	0.9332
HAP4-R	GCAGCAATGGTTTCCACATC
MEP2-F	CTGGACATGGTGGTCTAGTT	8338	113	y=3.0411x+24.823	0.9757
MEP2-R	GAGGTGACGGAATGTGGT
18S-F	AATCATCAAAGAGTCCGAAGACATTG	-	99	y=3.3258x+8.5239	0.945
18S-R	CCTTTACTACATGGTATAACTGTGG
