# Supplementary material for: A Novel Strategy for Selection and Validation of Reference Genes in Dynamic Multidimensional Experimental Design in Yeast
Source: PLoS One. 2012 Jun 4;7(6):e38351. doi: 10.1371/journal.pone.0038351 (PMC3366934; doi:10.1371/journal.pone.0038351)
Supplement: Table S5 — PCCs between the expressions of candidate gene pairs in response to ammonium pulse. (XLS) [file pone.0038351.s019.xls]

## Sheet: PCC-ammonium lim
	TDH3	RPS26A	GCN4	CDC19	ADH1	ARF1	FBA1	ACT1	TPI1	PDC1	CCW12
TDH3	1
RPS26A	0.550446	1
GCN4	-0.0241319	0.416108	1
CDC19	0.411191	-0.137876	-0.631042	1
ADH1	0.113154	0.339748	-0.0622965	0.233624	1
ARF1	-0.336372	-0.449754	-0.0953513	-0.051588	0.0443118	1
FBA1	0.340332	0.122567	-0.420765	0.780997	0.539388	-0.0365244	1
ACT1	0.294248	-0.342242	-0.363959	0.686325	0.0961723	0.182847	0.616171	1
TPI1	0.628741	0.395464	-0.19057	0.353121	-0.206519	-0.0745413	0.124915	0.00429451	1
PDC1	0.863406	0.246341	-0.3598	0.59294	-0.0893311	-0.194023	0.306462	0.368467	0.718107	1
CCW12	0.394693	0.729651	0.18134	0.0356285	0.748617	-0.414983	0.327049	-0.0675658	-0.0250227	0.132937	1
