# Supplementary material for: A Novel Strategy for Selection and Validation of Reference Genes in Dynamic Multidimensional Experimental Design in Yeast
Source: PLoS One. 2012 Jun 4;7(6):e38351. doi: 10.1371/journal.pone.0038351 (PMC3366934; doi:10.1371/journal.pone.0038351)
Supplement: Table S6 — Pairwise variations between the (n+1)th and the nth genes for different pools of candidate sets. (XLS) [file pone.0038351.s020.xls]

## Sheet: geNorm-results
glucose-lim	V2/3	V3/4	V4/5	V5/6	V6/7	V7/8	V8/9	V9/10	V10/11
P-0	0.155	0.129	0.101	0.105	0.107	0.127	0.114	0.093	0.096
P-1	0.205	0.154	0.146	0.172	0.127	0.102	0.114
P-2	0.178	0.194	0.232	0.159	0.116	0.127
P-3	0.219	0.164	0.148	0.177	0.13	0.103	0.114
P-4	0.164	0.202	0.24	0.164	0.118	0.127
P-5	0.279	0.245	0.203	0.172
ammonium-lim	V2/3	V3/4	V4/5	V5/6	V6/7	V7/8	V8/9	V9/10	V10/11
P-0	0.111	0.15	0.107	0.098	0.087	0.087	0.081	0.103	0.1
P-1	0.111	0.15	0.107	0.112	0.097	0.086	0.121	0.113
P-2	0.111	0.15	0.107	0.098	0.087	0.087	0.081	0.113
P-3	0.111	0.15	0.107	0.112	0.097	0.086	0.131
