# Supplementary material for: A Novel Strategy for Selection and Validation of Reference Genes in Dynamic Multidimensional Experimental Design in Yeast
Source: PLoS One. 2012 Jun 4;7(6):e38351. doi: 10.1371/journal.pone.0038351 (PMC3366934; doi:10.1371/journal.pone.0038351)
Supplement: Table S7 — Nucleic acid quantification of the samples. (XLS) [file pone.0038351.s021.xls]

## Sheet: RNA quality
Case Study I				Case Study II
Sample No	ng/ul	260/280	260/230	Sample No	ng/ul	260/280	260/230
1	177.36	2.21	2.16	1	101.48	2.19	1.69
2	151	2.23	2.13	2	111.24	2.19	2.15
3	92.16	2.21	2.2	3	122.68	2.19	2.1
4	85.25	2.24	1.91	4	107.26	2.19	2.31
5	93.56	2.19	1.82	5	115.34	2.2	2.33
6	109.8	2.22	2.18	6	118.1	2.22	2.05
7	108.75	2.23	2.17	7	113.43	2.18	2.34
8	103.74	2.23	2.05	8	118.81	2.22	2.03
9	104.89	2.23	1.72	9	136.84	2.17	2.27
10	126.57	2.23	1.9	10	119.1	2.21	1.3
11	147.81	2.24	1.86	11	165.26	2.2	1.68
12	154.71	2.22	2.27	12	168.13	2.22	1.57
13	152.81	2.24	2.46	13	208.92	2.22	2.44
14	175.94	2.25	2.29	14	127.04	2.24	2.19
